# Supplementary material
Source: PubMed Central journal article supplement (PMC2275072)
Supplement: bj4070419add.pdf [file bj4070419add.pdf]

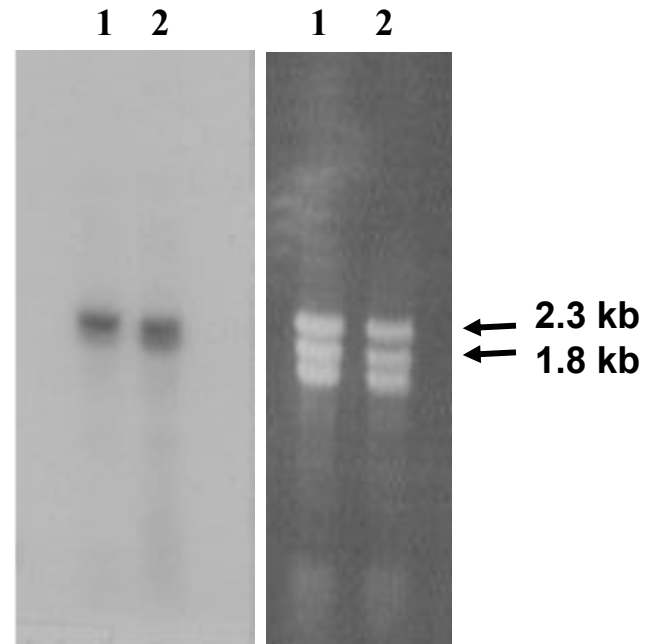

### Supplementary Figure 1. Northern analysis of *Tcgal* RNA

10  $\mu$ g total RNA from the *T. cruzi* clones CL Brener (lane 1) and Silvio X10/6 were analysed by northern blotting use the *Tcgal* gene as a radiolabelled probe. Left panel, autoradiograph; right panel, ethidium bromide stained gel. The transcript has an estimated size of approximately 2 kb, using the ribosomal RNA bands as markers.

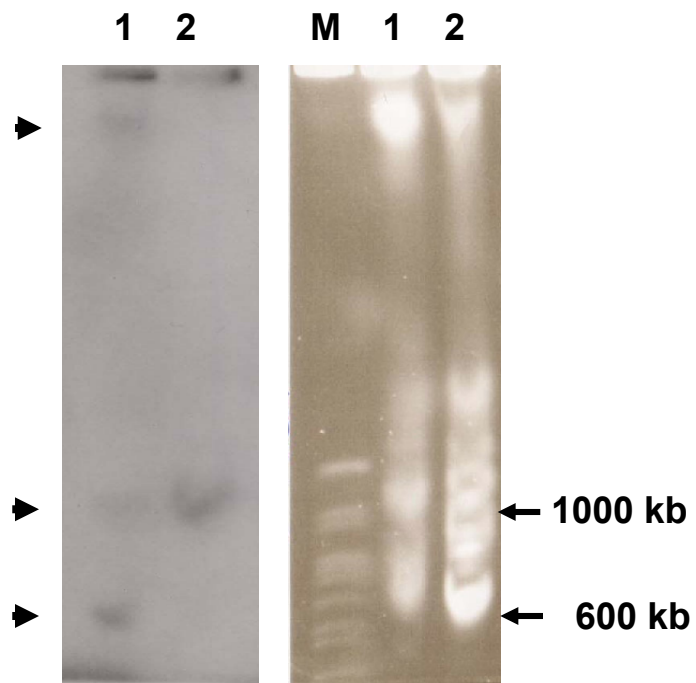

**Supplementary Figure 2. Chromosomal location of the *Tcgal* genes.**

Chromosomal DNA from *T. cruzi* clones CL Brener (lane 1) and Silvio X10/6 (lane 2) was fractionated using a BioRad CHEFE Mapper, transferred to a nylon membrane and hybridised with radiolabelled *Tcgal*. Left panel, autoradiograph; right panel ethidium bromide stained gel. M, *Saccharomyces cerevisiae* chromosomal markers (BioRad)
